# Supplementary material for: Optimal waist circumference cut-off points and ability of different metabolic syndrome criteria for predicting diabetes in Japanese men and women: Japan Epidemiology Collaboration on Occupational Health Study
Source: PubMed Central journal article supplement (PMC4778284; doi:10.1186/s12889-016-2856-9), 2016-03-03

Figure S1 Kaplan-Meier estimates of diabetes-free survival by metabolic syndrome (JIS criteria) and sex

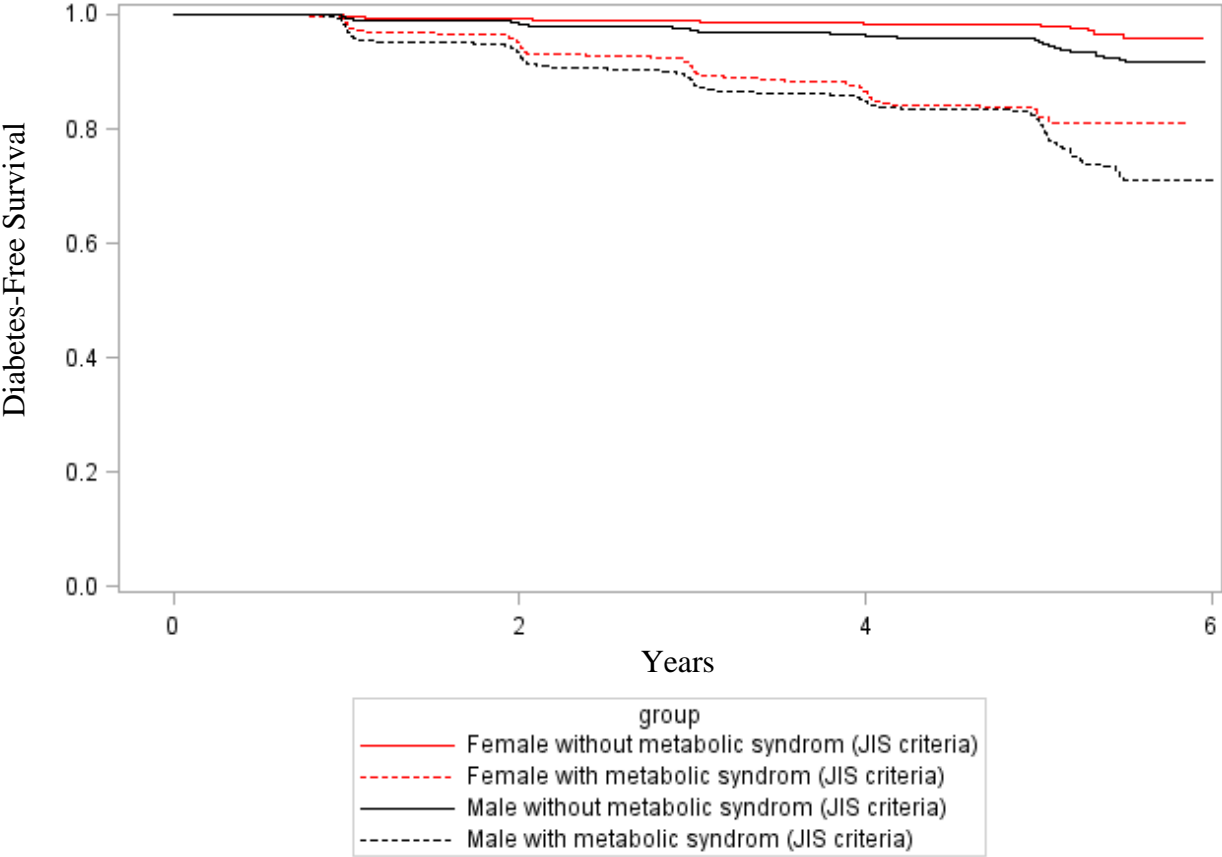

Figure S2 Kaplan-Meier estimates of diabetes-free survival by metabolic syndrome (JCCMS criteria) and sex

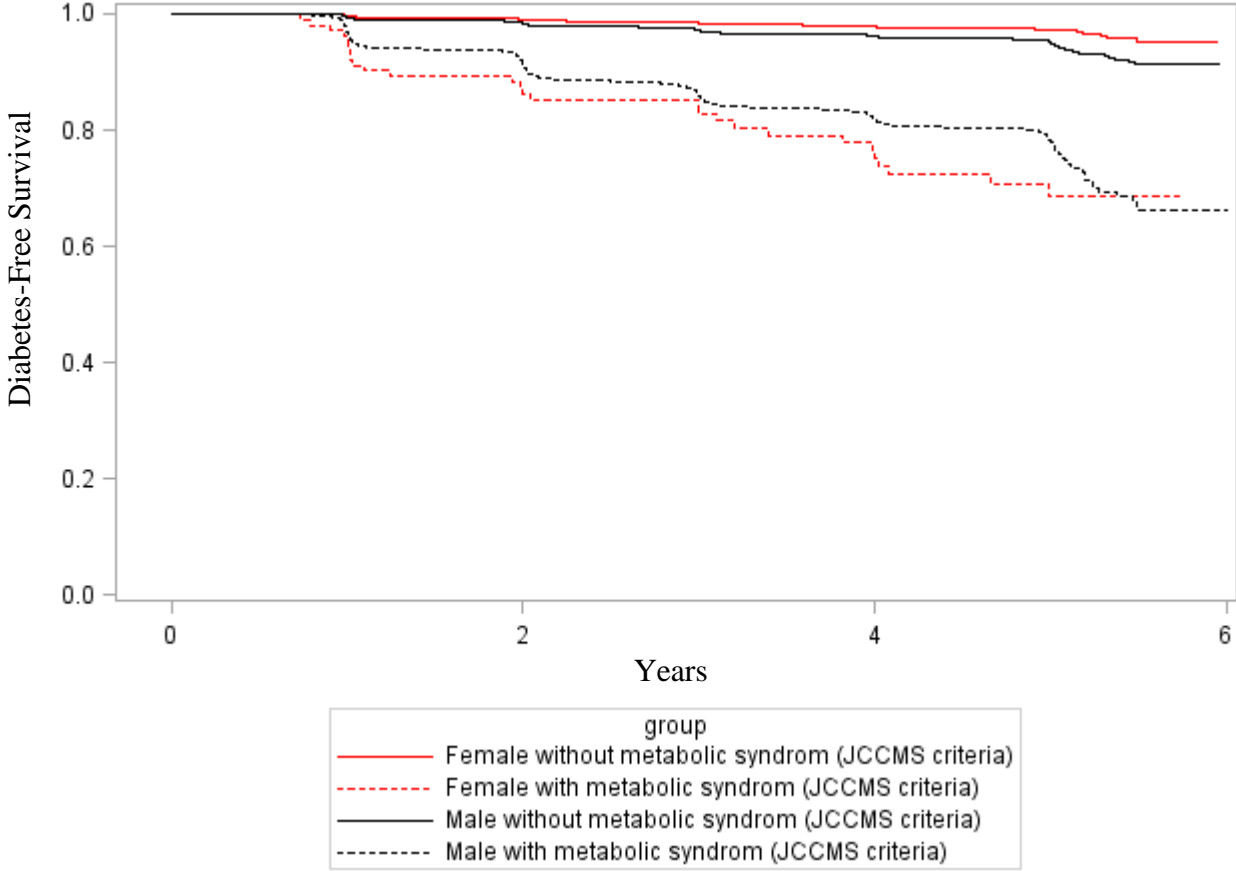

Supplement: 12889_2016_2856_MOESM2_ESM.pdf [file 12889_2016_2856_MOESM2_ESM.pdf]
